# Supplementary material for: Approximately size extensive local multireference singles and doubles configuration interaction
Source: Royal Society of Chemistry journal article supplement (doi:10.1039/c2cp23757a), 2012-01-01
Supplement: c2cp23757a.pdf [file c2cp23757a.pdf]

Supporting Information

---

| <b>Molecule</b> | <b>Converged</b> | <b>Number of vectors in Newton-Raphson procedure</b> | <b>Number of linearly independent vectors in the Newton-Raphson procedure.</b> |
|-----------------|------------------|------------------------------------------------------|--------------------------------------------------------------------------------|
| Propane         | yes              | 11                                                   | 9                                                                              |
| Butane          | no               | 40                                                   | 20                                                                             |
| Pentane         | yes              | 15                                                   | 14                                                                             |
| Hexane          | no               | 40                                                   | 10                                                                             |
| Heptane         | yes              | 15                                                   | 14                                                                             |
| Octane          | no               | 40                                                   | 8                                                                              |

Table 1: The Newton-Raphson approach for solving the ACPF equations is not stable for CD-LACPF. Large numbers of linearly dependent vectors indicate a failure of the solver.
